# Supplementary material for: Novel gold(i) diphosphine-based dimers with aurophilicity triggered multistimuli light-emitting properties
Source: Royal Society of Chemistry journal article supplement (doi:10.1039/c6tc01427e), 2016-01-01
Supplement: c6tc01427e2.pdf [file c6tc01427e2.pdf]

## SUPPORTING INFORMATION

### **Novel gold(I) diphosphine-based dimers with aurophilicity-triggered multistimuli light-emitting properties**

Csaba Jobbágy,<sup>a</sup> Péter Baranyai,<sup>a</sup> Gábor Marsi,<sup>a</sup> Barbara Rácz,<sup>a</sup> Liang Li,<sup>b</sup>  
Pance Naumov\*<sup>b</sup> and Andrea Deák\*<sup>a</sup>

<sup>a</sup> Hungarian Academy of Sciences, MTA TTK SZKI,  
“Lendület” Supramolecular Chemistry Research Group,  
1117 Budapest, Magyar Tudósok körútja 2, Hungary;  
E-mail: [deak.andrea@ttk.mta.hu](mailto:deak.andrea@ttk.mta.hu)

<sup>b</sup> New York University Abu Dhabi, P.O. Box 129188,  
Abu Dhabi, United Arab Emirates;  
E-mail: [pance.naumov@nyu.edu](mailto:pance.naumov@nyu.edu)

Compound **1**: Yield: 0.423g (88%); HRMS-ESI ( $m/z$ ):  $\{[\text{Au}_2(\text{dpephos})_2]\text{NO}_3\}^+$  calcd for  $\text{C}_{72}\text{H}_{56}\text{NO}_5\text{P}_4\text{Au}_2$ , 1532.244; found, 1532.237.

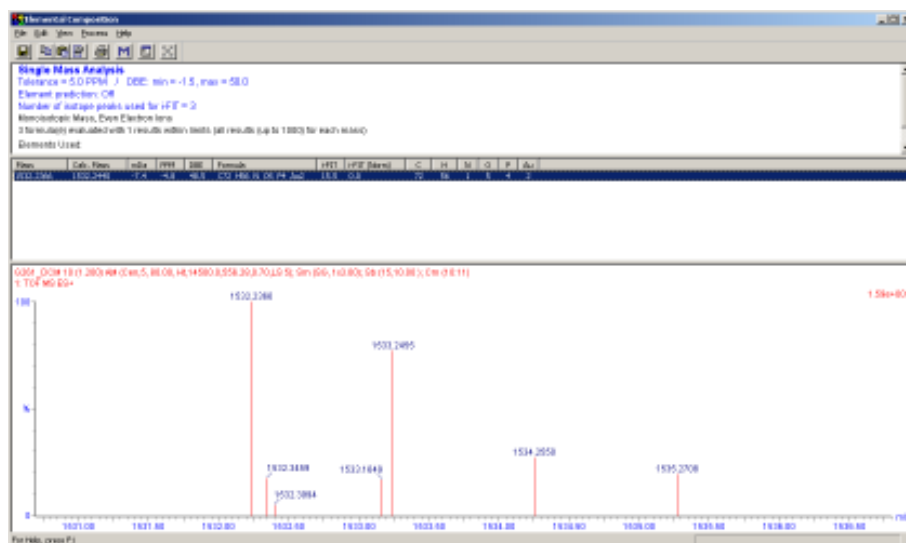

**Fig. S1** HRMS-ESI spectra of **1**.

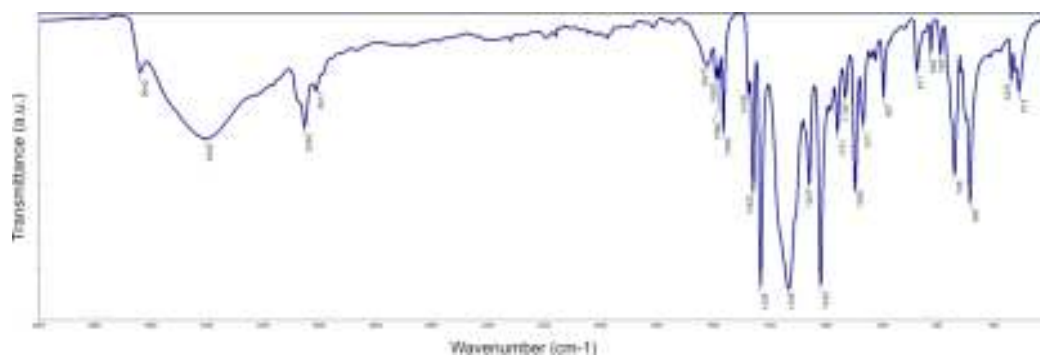

**Fig. S2** FTIR spectra of compound **1**.



Compound **2**: Yield: 0.354g (85%); HRMS–ESI ( $m/z$ ):  $\{[\text{Au}_2(\text{dpephos})_2]\text{CF}_3\text{SO}_3\}^+$  calcd for  $\text{C}_{73}\text{H}_{56}\text{O}_5\text{F}_3\text{P}_4\text{SAu}_2$ , 1619.208; found, 1619.196.

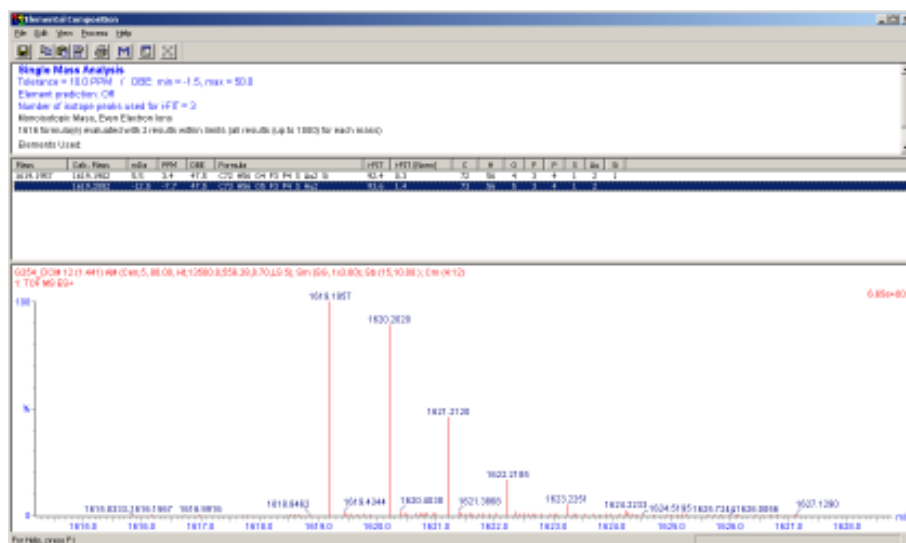

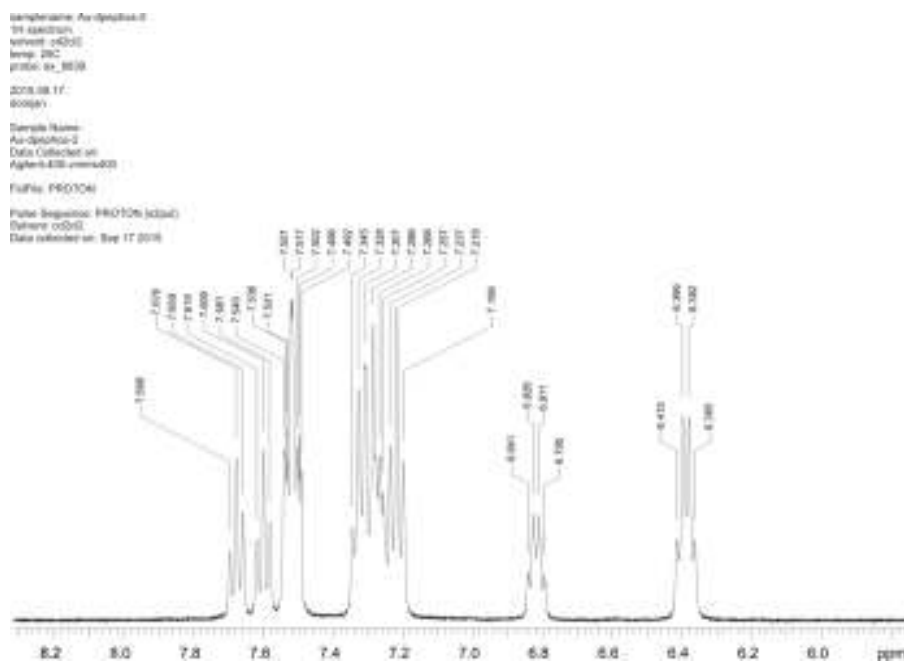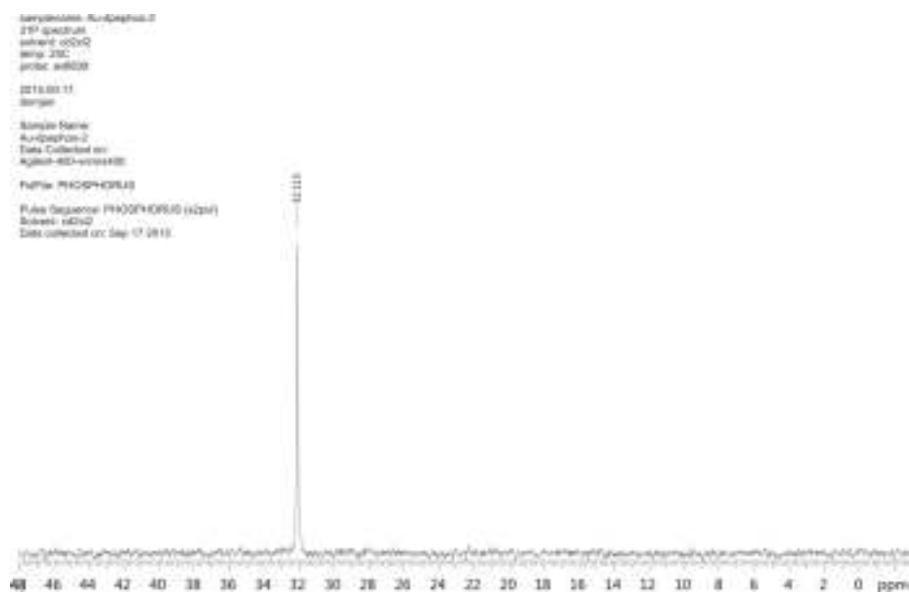

Compound **3**: Yield: 0.175g (79%); HRMS–ESI ( $m/z$ ):  $\{[\text{Au}_2(\text{dpephos})_2]\text{BF}_4\}^+$  calcd for  $\text{C}_{72}\text{H}_{56}^{10}\text{BO}_2\text{F}_4\text{P}_4\text{Au}_2$ , 1556.263; found, 1556.270.

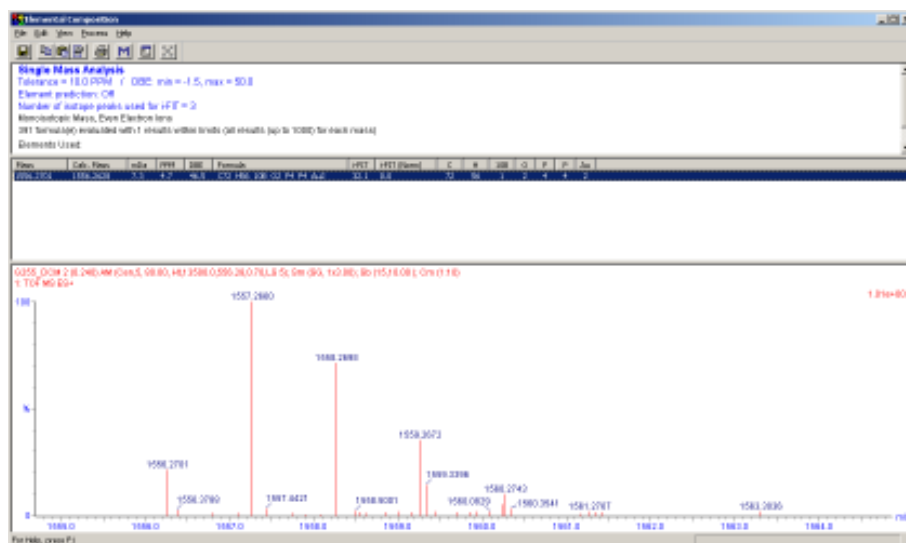

**Fig. S9** HRMS-ESI spectra of **3**.

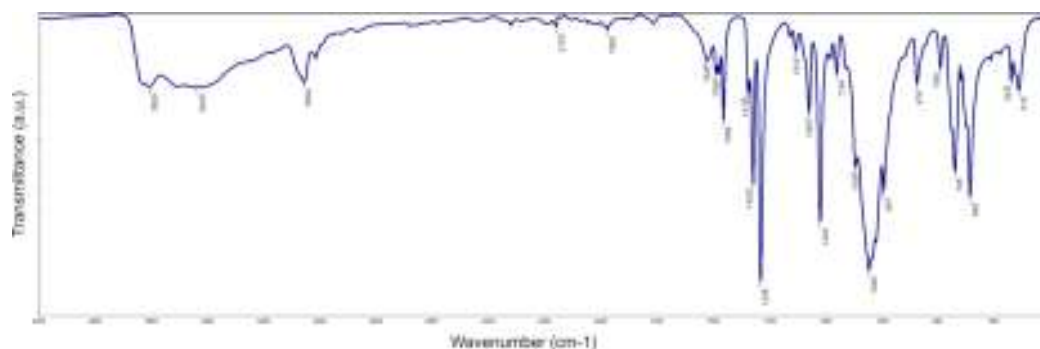

**Fig. S10** FTIR spectra of compound **3**.

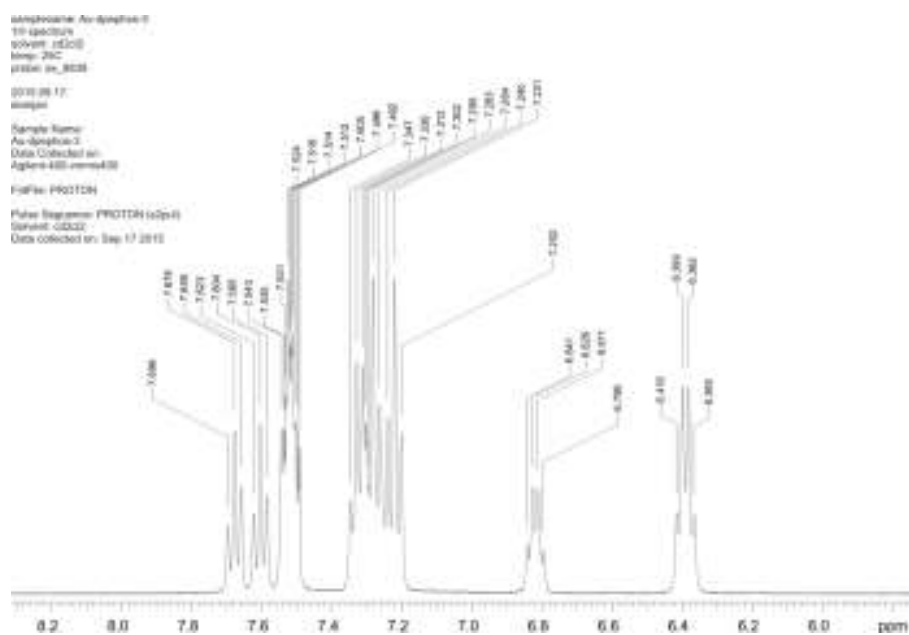

Fig. S11  $^1\text{H}$ -NMR spectra of compound **3**.

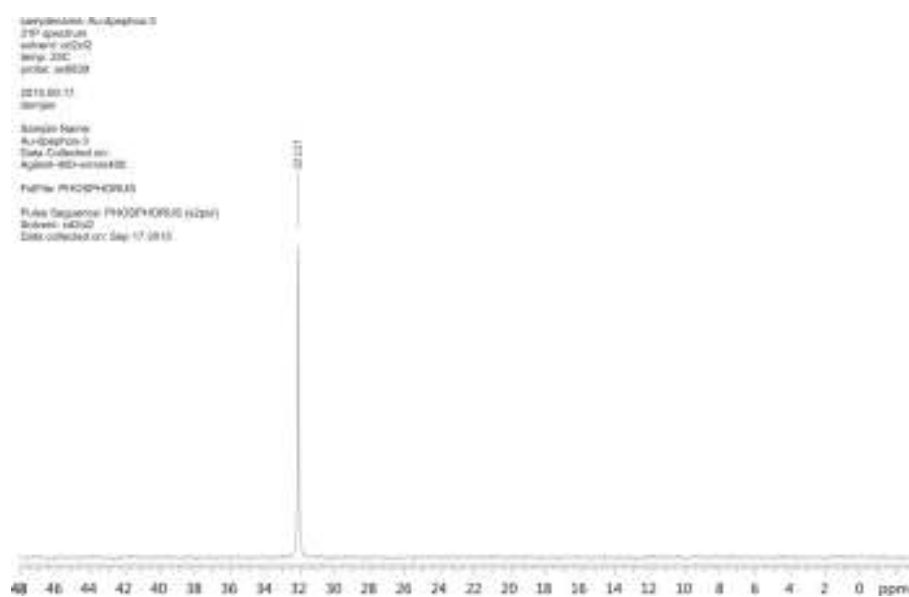

Fig. S12  $^{31}\text{P}$ -NMR spectra of compound **3**.

Compound **4**: Yield: 0.322g (92%); HRMS–ESI ( $m/z$ ):  $\{[\text{Au}_2(\text{dpephos})_2]\text{PF}_6\}^+$  calcd for  $\text{C}_{72}\text{H}_{56}\text{O}_2\text{F}_6\text{P}_5\text{Au}_2$ , 1615.220; found, 1615.216.

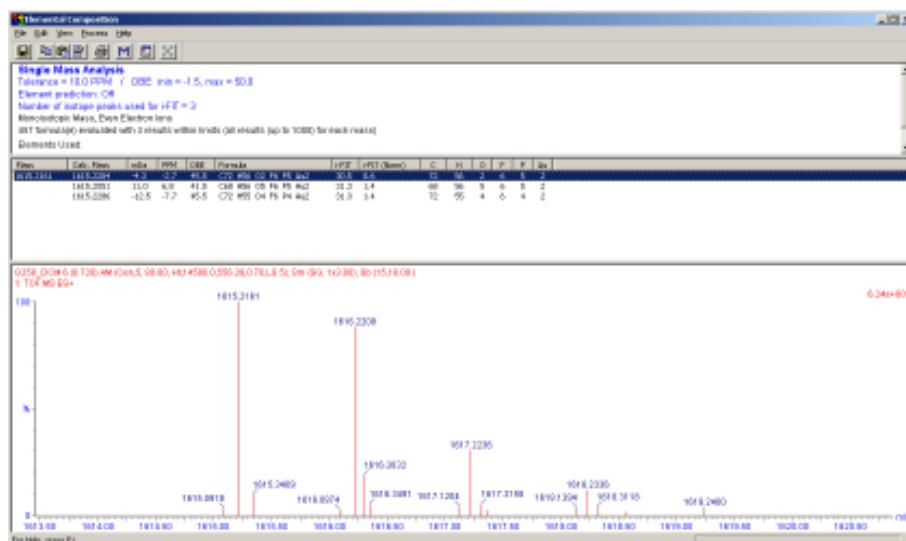

**Fig. S13** HRMS-ESI spectra of **4**.

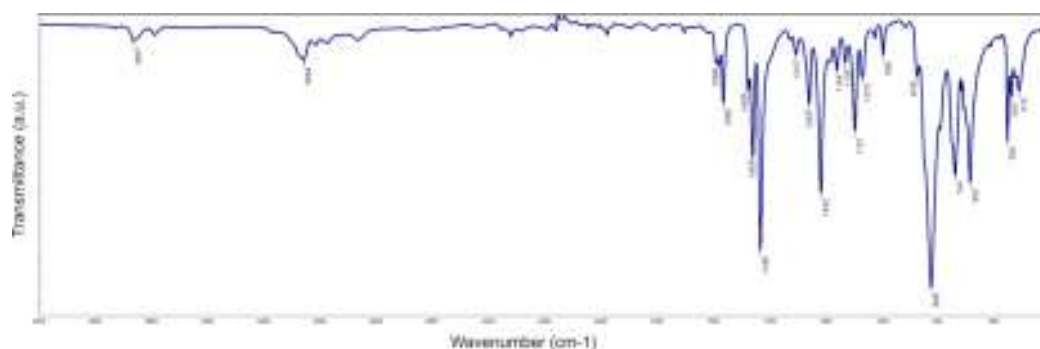

**Fig. S14** FTIR spectra of compound **4**.





Compound **5**: Yield: 0.358g (92%); HRMS–ESI ( $m/z$ ):  $\{[\text{Au}_2(\text{dpephos})_2]\text{SbF}_6\}^+$  calcd for  $\text{C}_{72}\text{H}_{56}\text{O}_2\text{F}_6\text{P}_4\text{SbAu}_2$ , 1705.150; found, 1705.152.

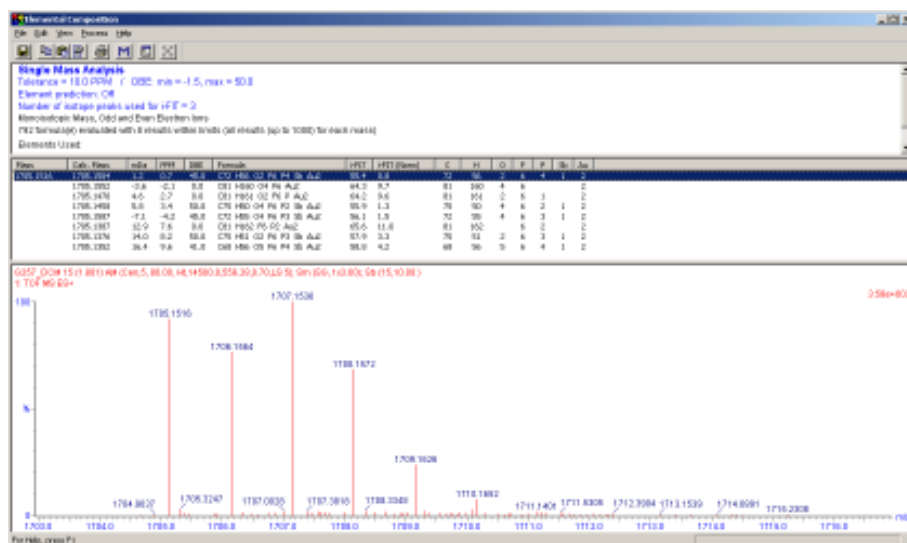

Fig. S17 HRMS-ESI spectra of **5**.

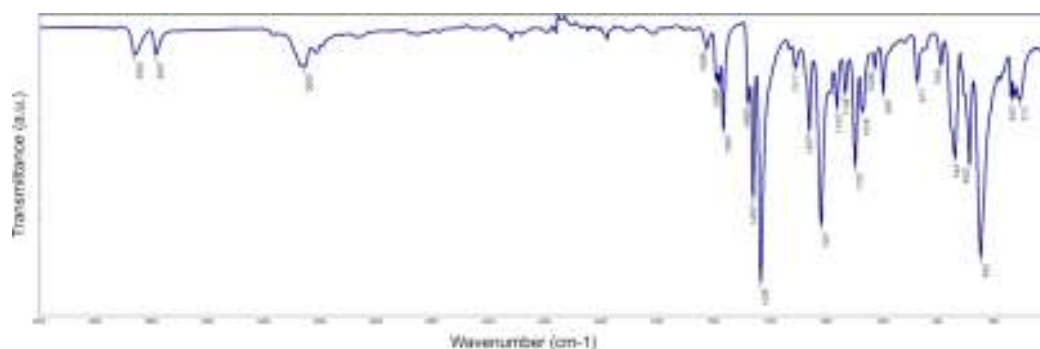

Fig. S18 FTIR spectra of compound **5**.

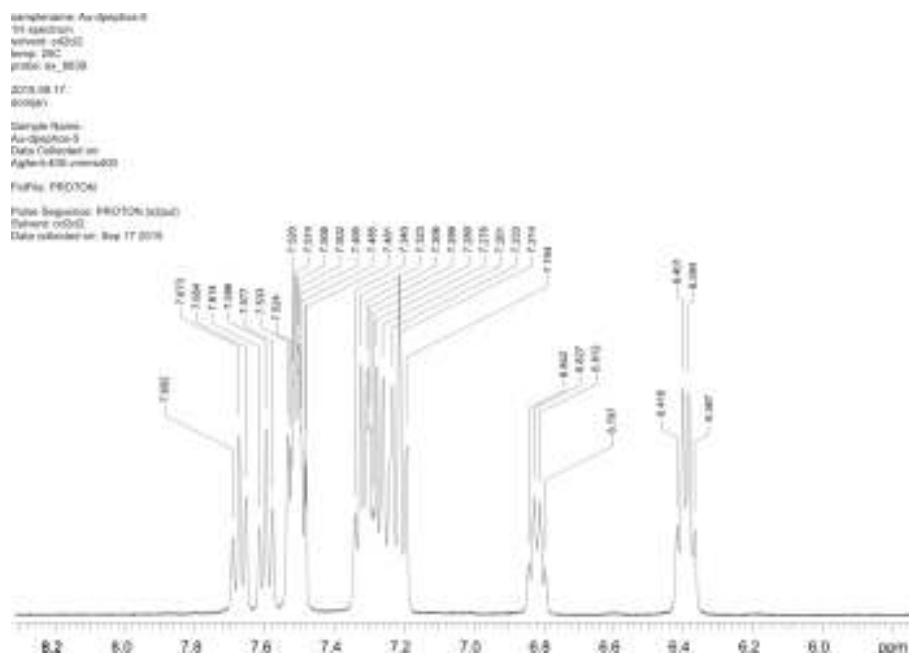

Fig. S19  $^1\text{H}$ -NMR spectra of compound **5**.

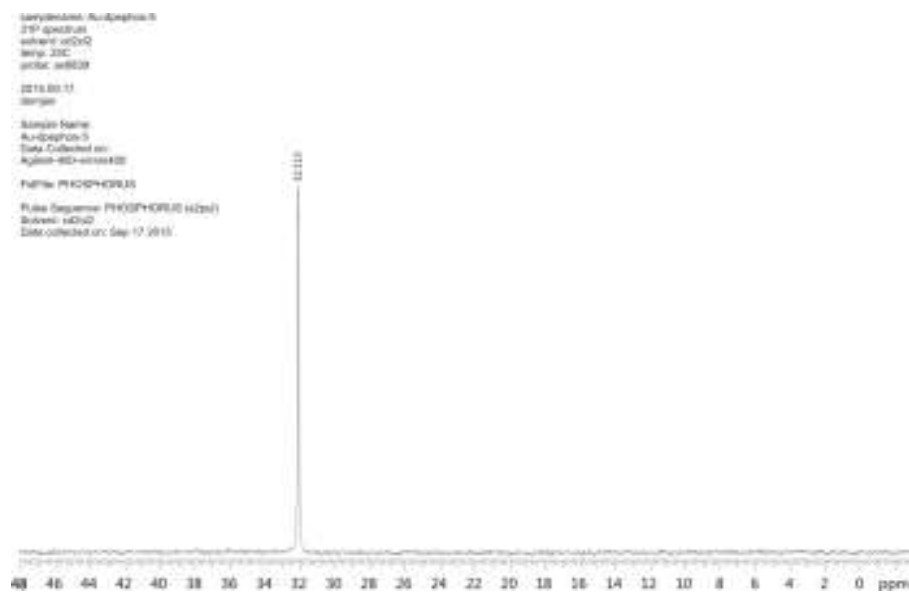

Fig. S20  $^{31}\text{P}$ -NMR spectra of compound **5**.

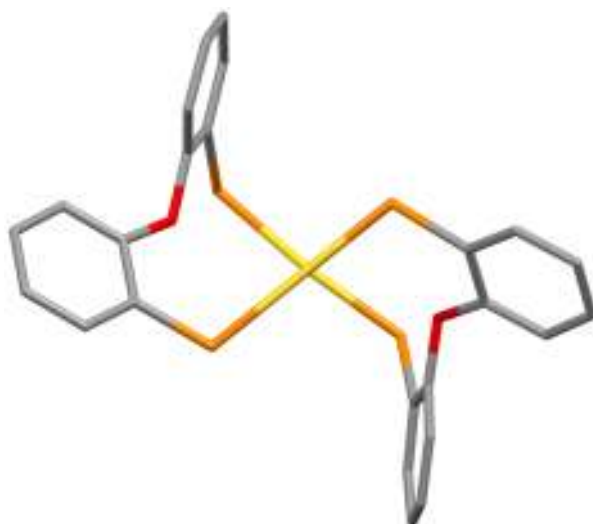

**Fig. S21** Twist-boat conformation of  $[\text{Au}_2(\text{dpephos})_2]^{2+}$  skeleton with Au...Au axis perpendicular to the page. Colour scheme: gold, yellow; phosphorous, orange; carbon, grey; oxygen, red;. Hydrogen atoms and phenyl groups have been omitted.

## Computational studies

In the present study density functional theory (DFT) and time-dependent density functional theory (TD DFT) calculations were performed by using the *Gaussian 09* program package<sup>[1]</sup> at the M06/6-31G\* level of theory.<sup>[2]</sup> Relativistic effects were included for the Au atom by using the Los Alamos National Laboratory double zeta type (LANL2DZ) pseudopotential. The geometries of the singlet ground state ( $S_0$ ) and triplet excited state ( $T_1$ ) of the  $[\text{Au}_2(\text{dpephos})_2]^{2+}$  cation were fully optimized in the gas phase without symmetry constraints. Due to convergence problems with the TD DFT optimization, the structure for the lowest triplet excited states ( $T_1$ ) of the complex cation was optimized with the unrestricted UM06/LAN2LDZ method. After geometry optimization the excited states were investigated by TD DFT analysis. The absorption energies were obtained by TD DFT method at the optimized ground state geometry using the same functional and basis sets as for geometry optimization. The lowest energy triplet emission was determined by TD DFT calculation with M06 functional at the optimized triplet ( $T_1$ ) structure. The molecular orbital surfaces were plotted by Molekel 5.4 visualization software at an isosurface value of 0.03 au.<sup>[3]</sup>

**Table S1** Selected bond lengths (Å), bond angles (°) and torsion angles (°) in optimized singlet ground state ( $S_0$ ) and triplet excited state ( $T_1$ ) structures of  $[\text{Au}_2(\text{dpephos})_2]^{2+}$  cation.

|                       | $S_0$  | $T_1$   |
|-----------------------|--------|---------|
| Au(1)–P(1)            | 2.389  | 2.487   |
| Au(1)–P(3)            | 2.391  | 2.489   |
| Au(2)–P(2)            | 2.362  | 2.381   |
| Au(2)–P(4)            | 2.365  | 2.382   |
| Au(1)···Au(2)         | 3.371  | 2.942   |
| P(1)–Au(1)–P(3)       | 161.53 | 112.46  |
| P(2)–Au(2)–P(4)       | 175.85 | 175.76  |
| P(1)–C(1)–C(8)–P(2)   | 48.87  | 49.74   |
| P(3)–C(13)–C(20)–P(4) | 52.23  | 50.62   |
| P(1)–P(3)–P(4)–P(2)   | 68.60  | 63.12   |
| P(1)–Au(1)–Au(2)–P(2) | 81.08  | 70.78   |
| P(3)–Au(1)–Au(2)–P(4) | 84.93  | 70.62   |
| P(1)–Au(1)–Au(2)–P(4) | –98.51 | –109.86 |
| P(3)–Au(1)–Au(2)–P(2) | –95.48 | –108.75 |

**Table S2** Absorption and emission wavelengths ( $\lambda$ ), oscillator strengths (f) and orbital compositions for singlet and triplet excited states of  $[\text{Au}_2(\text{dpephos})_2]^{2+}$  cation computed by TD DFT method.

| Excited state  | $\lambda$ | f      | (Assignment: H = HOMO, L = LUMO)                                                                                                       |
|----------------|-----------|--------|----------------------------------------------------------------------------------------------------------------------------------------|
| S <sub>1</sub> | 291       | 0.0221 | H $\rightarrow$ L (81%), H-1 $\rightarrow$ L+2 (9%), H $\rightarrow$ L+1 (4%)                                                          |
| S <sub>2</sub> | 286       | 0.0012 | H-1 $\rightarrow$ L (47%), H $\rightarrow$ L+2 (35%),<br>H-1 $\rightarrow$ L+1 (7%), H $\rightarrow$ L+1 (2%)                          |
| S <sub>3</sub> | 285       | 0.0005 | H $\rightarrow$ L (11%), H $\rightarrow$ L+1 (73%), H-1 $\rightarrow$ L+2 (8%),<br>H $\rightarrow$ L+2 (4%)                            |
| S <sub>4</sub> | 282       | 0.0064 | H-1 $\rightarrow$ L (41%), H-1 $\rightarrow$ L+1 (39%),<br>H $\rightarrow$ L+2 (16%)                                                   |
| S <sub>5</sub> | 275       | 0.0033 | H-2 $\rightarrow$ L (84%), H-2 $\rightarrow$ L+1 (4%),<br>H-1 $\rightarrow$ L+2 (3%)                                                   |
| S <sub>6</sub> | 274       | 0.0016 | H-1 $\rightarrow$ L+1 (26%), H $\rightarrow$ L+2 (28%),<br>H $\rightarrow$ L+3 (30%), H-2 $\rightarrow$ L (3%), H $\rightarrow$ L (3%) |
| T <sub>1</sub> | 683       | 0      | H $\rightarrow$ L (87%), H-24 $\rightarrow$ L (4%)                                                                                     |

**Table S3** Compositions of molecular orbitals involved in the main absorption and emission transitions of  $[\text{Au}_2(\text{dpephos})_2]^{2+}$  cation obtained from TD DFT analysis.

| Transition                                  | Orbital | Au atoms <sup>a</sup> |       |       | Phosphine ligands |
|---------------------------------------------|---------|-----------------------|-------|-------|-------------------|
|                                             |         | s                     | p     | d     |                   |
| S <sub>0</sub> $\rightarrow$ S <sub>1</sub> | HOMO    | 0                     | 0.002 | 0.002 | 0.950             |
|                                             |         | 0.001                 | 0.038 | 0.007 |                   |
|                                             | LUMO    | 0                     | 0.249 | 0.001 | 0.553             |
|                                             |         | 0                     | 0.197 | 0     |                   |
| T <sub>1</sub> $\rightarrow$ S <sub>0</sub> | HOMO    | 0                     | 0.002 | 0.003 | 0.792             |
|                                             |         | 0                     | 0.085 | 0.118 |                   |
|                                             | LUMO    | 0.017                 | 0.238 | 0.016 | 0.362             |
|                                             |         | 0.196                 | 0.067 | 0.104 |                   |

<sup>a</sup> The first line and the second lines correspond to the Au1 and Au2 atoms respectively.

## Thermochromic luminescence (298 vs. 77K)

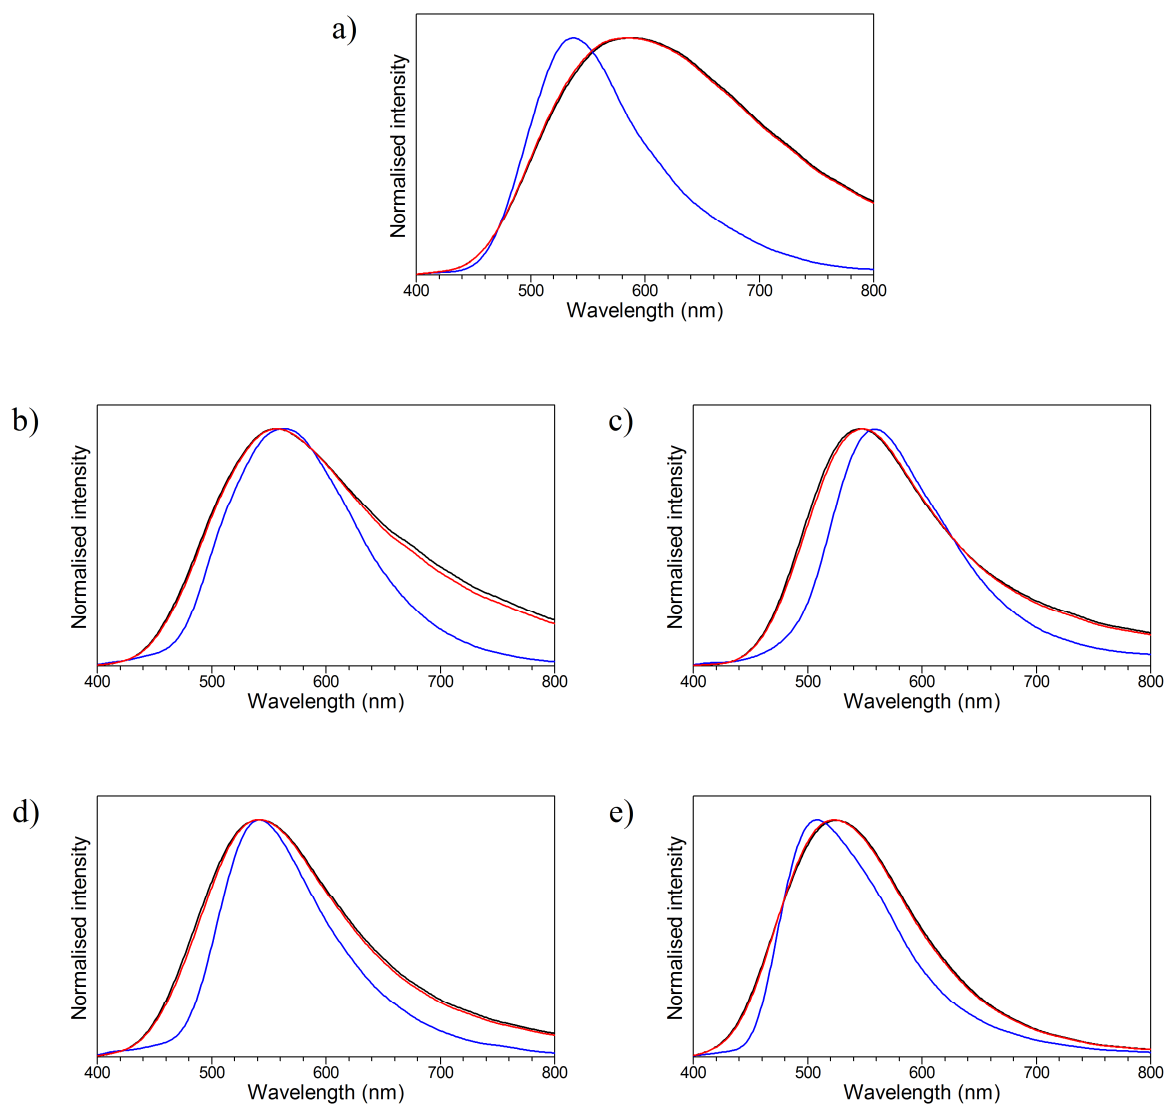

**Fig. S22** Emission spectra of complexes **1** (a), **2** (b), **3** (c), **4** (d) and **5** (e) at 298 K (black and red lines), and 77 K (blue line) showing the reversible thermochromic luminescence upon excitation with 365 nm.

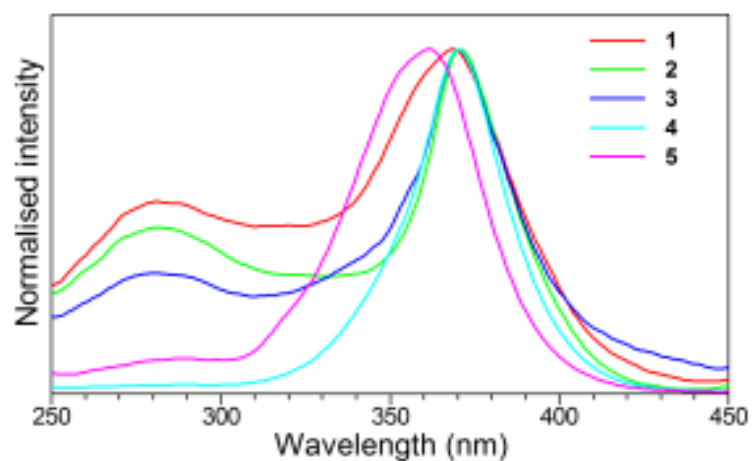

**Fig. S23** Excitation spectra of crystals of **1–5** showing the HE band.

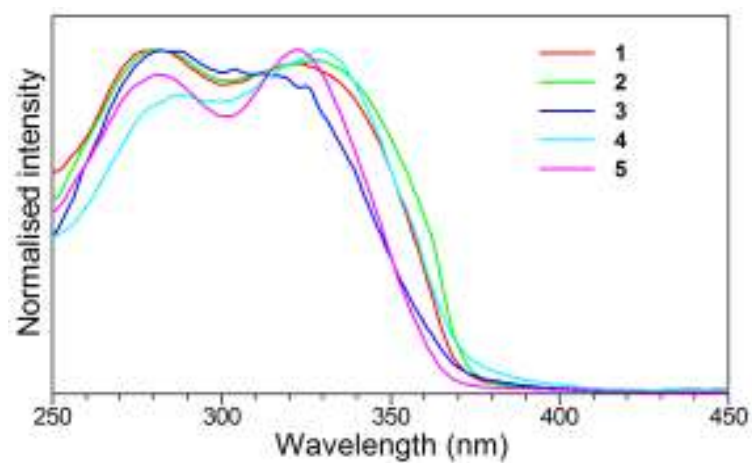

**Fig. S24** Excitation spectra of crystals of **1–5** showing the LE band.

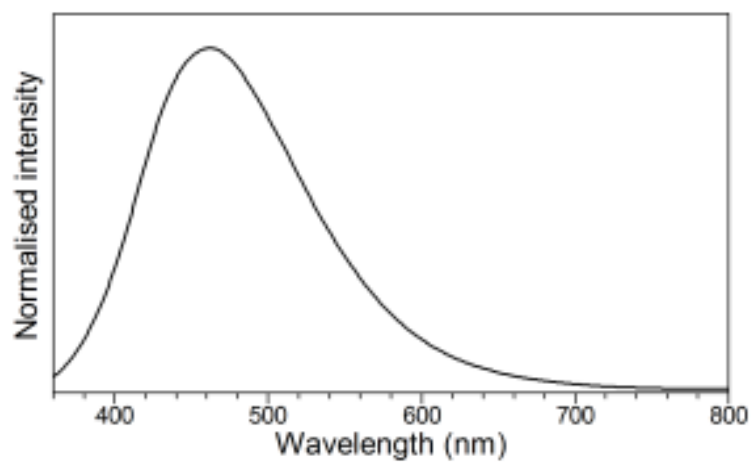

**Fig. S25** Emission spectrum of dpephos ligand in glassy matrix (MeOH:EtOH, 4:1) at 77 K.



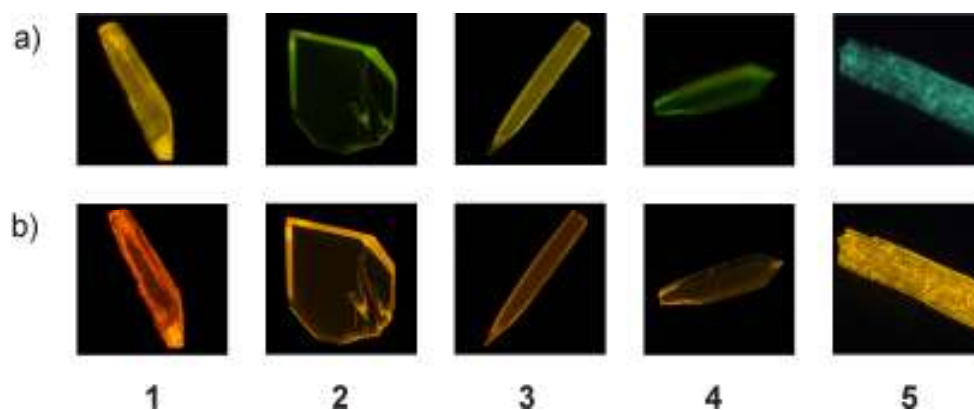

**Fig. S26** Photographs of individual crystals of **1–5** taken under 365 nm (a) and 312 nm (b) UV lamp at room temperature.

**Table S4** Emission maxima (in nm) and luminescent lifetimes (in  $\mu\text{s}$ ) of HE and LE bands for individual crystals of **1–5** at 298 K.

| Complex  | $\lambda_{\text{ex}} = 365 \text{ nm}$ |        | $\lambda_{\text{ex}} = 312 \text{ nm}$ |        |
|----------|----------------------------------------|--------|----------------------------------------|--------|
|          | $\lambda_{\text{max}}$                 | $\tau$ | $\lambda_{\text{max}}$                 | $\tau$ |
| <b>1</b> | 590                                    | 1.8    | 631                                    | 19     |
| <b>2</b> | 566                                    | 2.7    | 640                                    | 20     |
| <b>3</b> | 550                                    | 2.5    | 672                                    | 22     |
| <b>4</b> | 537                                    | 1.4    | 588                                    | 20     |
| <b>5</b> | 530                                    | 1.5    | 570                                    | 19     |

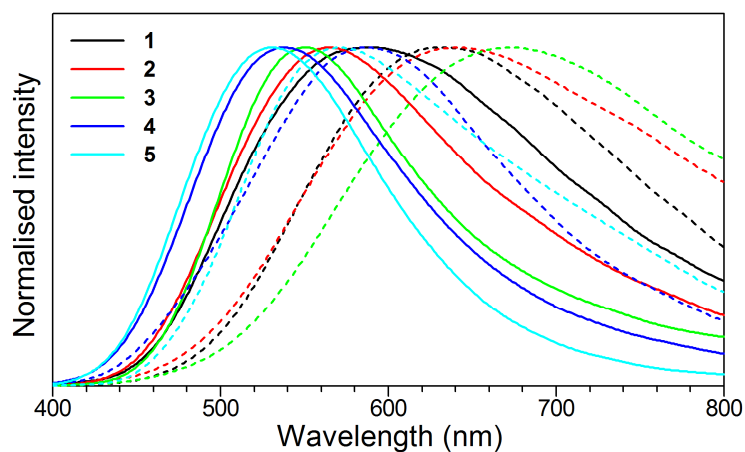

**Fig. S27** Excitation wavelength-dependent emission spectra of individual crystals of **1–5** at 298 K ( $\lambda_{\text{ex}} = 365 \text{ nm}$ , solid lines;  $\lambda_{\text{ex}} = 312 \text{ nm}$ , dashed lines).

## Mechanochromic luminescence

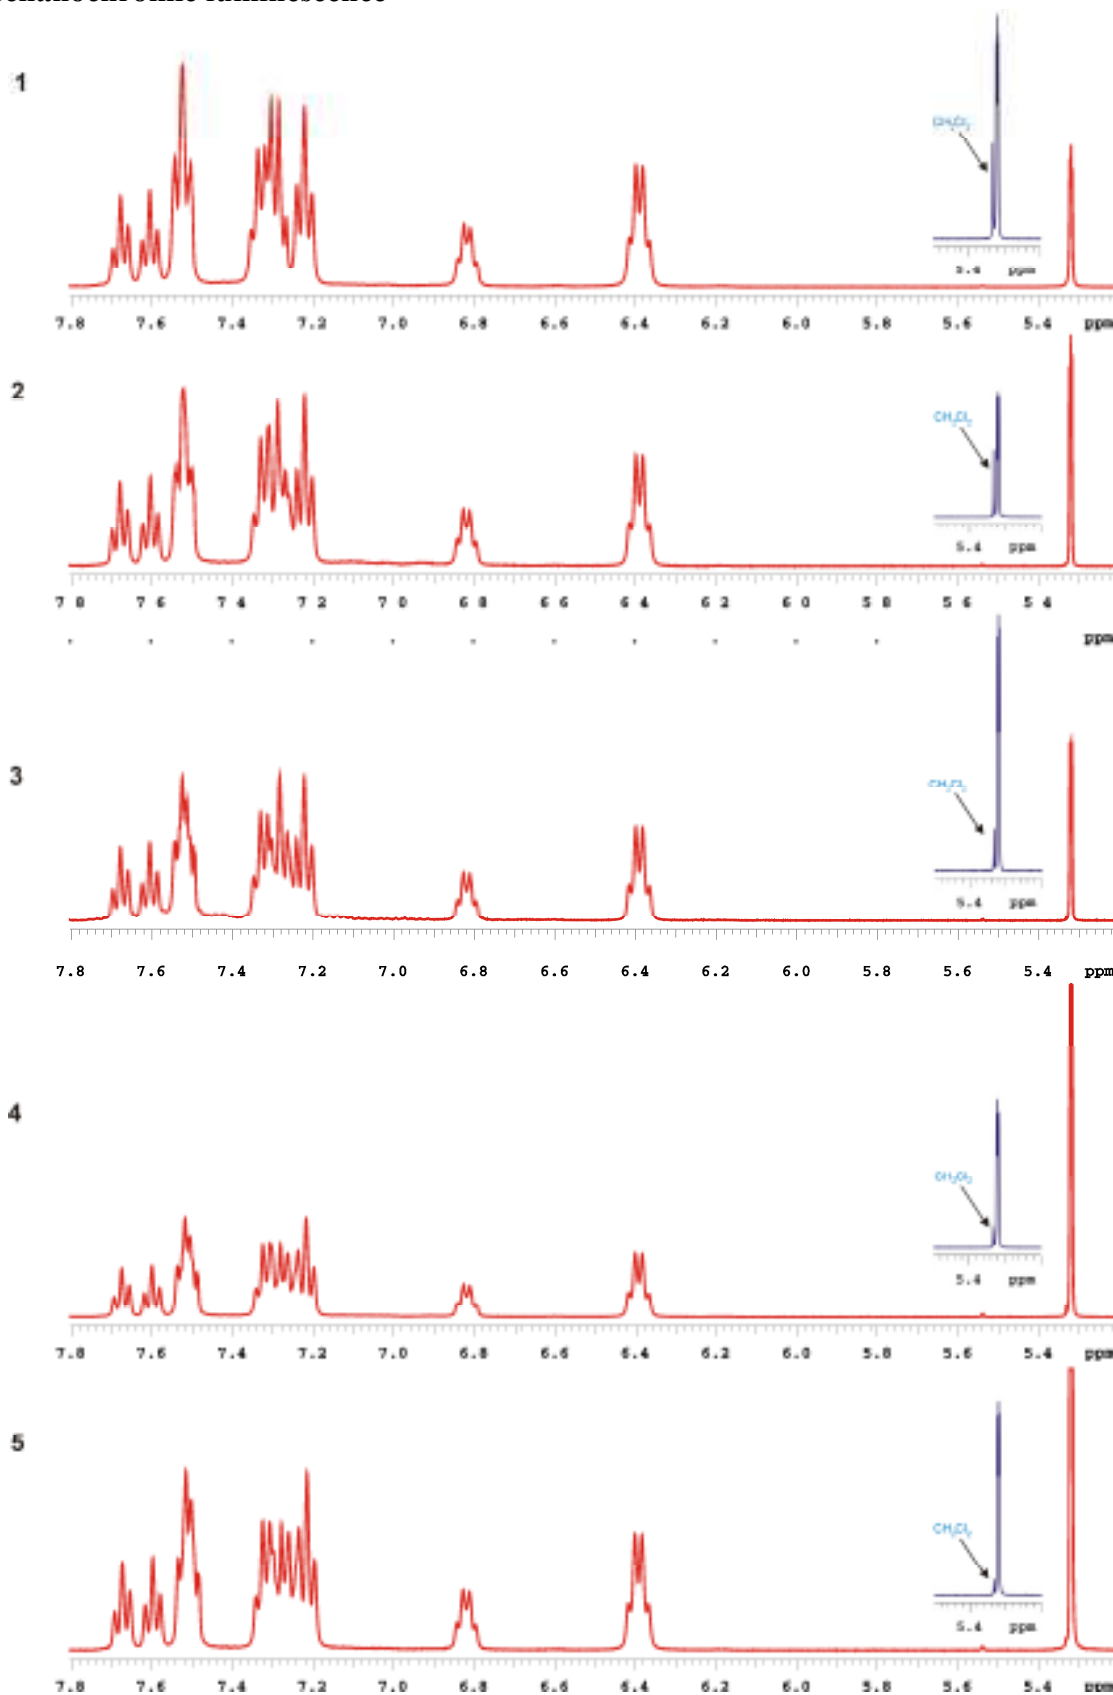

**Fig. S28**  $^1\text{H}$ -NMR spectra of ground **1–5** (red lines). Insets: details between 5.2 and 5.5 ppm from the  $^1\text{H}$ -NMR spectra of unground crystals of **1–5** (blue lines).

**Table S5** Emission data for crystalline-to-amorphous phase transition of complex **1**.

| Complex                     | Stimuli  | Cycle No. | $\lambda_{\text{ex}} = 365 \text{ nm}$ |                              | $\lambda_{\text{ex}} = 312 \text{ nm}$ |                              |
|-----------------------------|----------|-----------|----------------------------------------|------------------------------|----------------------------------------|------------------------------|
|                             |          |           | $\lambda_{\text{max}} \text{ (nm)}$    | $\tau \text{ (}\mu\text{s)}$ | $\lambda_{\text{max}} \text{ (nm)}$    | $\tau \text{ (}\mu\text{s)}$ |
| <b>1</b>                    | -        | -         | 592                                    | 1.7                          | 611                                    | 21                           |
|                             | Grinding | 1         | 688                                    | 18                           | 670                                    | 18                           |
| <b>1R</b>                   | Fuming   | 1         | 640                                    | 17                           | 637                                    | 19                           |
| <b>single crystal of 1R</b> |          |           | 639                                    | 19                           | 642                                    | 20                           |

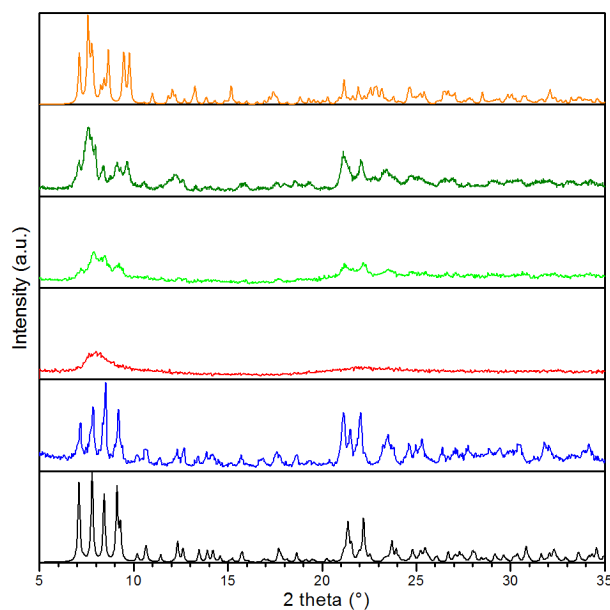**Fig. S29** PXRd diffractograms showing the simulated (black) and experimental patterns of unground **1** (blue), ground **1** (red), ground **1** after exposure to CH<sub>2</sub>Cl<sub>2</sub> vapour (light green) and after addition of CH<sub>2</sub>Cl<sub>2</sub>, followed by solvent evaporation (dark green), as well as the simulated (orange) patterns of **1R**.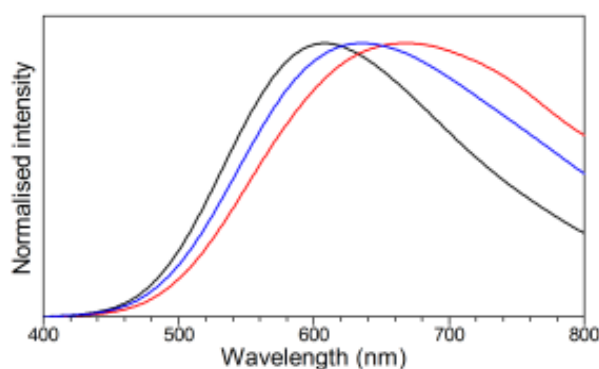**Fig. S30** Emission spectra showing the reversible mechanochromic luminescence of complex **1** (unground, black; ground, red and fumed, blue) upon excitation with 312 nm.

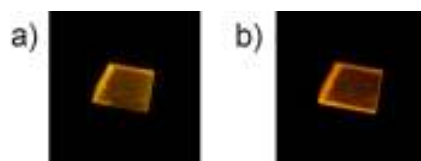

**Fig. S31** Photographs of individual crystal of **1R** taken under 365 nm (a) and 312 nm (b) UV lamp at room temperature.

**Table S6** Emission data for crystalline-to-amorphous phase transition of complex **2**.

| Complex  | Stimuli | Cycle No. | $\lambda_{\text{ex}} = 365 \text{ nm}$ |                          | $\lambda_{\text{ex}} = 312 \text{ nm}$ |                          |
|----------|---------|-----------|----------------------------------------|--------------------------|----------------------------------------|--------------------------|
|          |         |           | $\lambda_{\text{max}}$ (nm)            | $\tau$ ( $\mu\text{s}$ ) | $\lambda_{\text{max}}$ (nm)            | $\tau$ ( $\mu\text{s}$ ) |
| <b>2</b> | -       | -         | 565                                    | 2.9                      | 614                                    | 17                       |
|          |         | 1         | 687                                    | 19                       | 679                                    | 20                       |
|          |         | 2         | 683                                    | 18                       | 678                                    | 19                       |
|          |         | 3         | 688                                    | 20                       | 680                                    | 18                       |
|          | Fuming  | 4         | 684                                    | 20                       | 681                                    | 21                       |
|          |         | 1         | 570                                    | 3.6                      | 614                                    | 16                       |
|          |         | 2         | 571                                    | 2.9                      | 615                                    | 18                       |
|          |         | 3         | 569                                    | 3.2                      | 616                                    | 17                       |
|          |         | 4         | 570                                    | 3.5                      | 616                                    | 17                       |

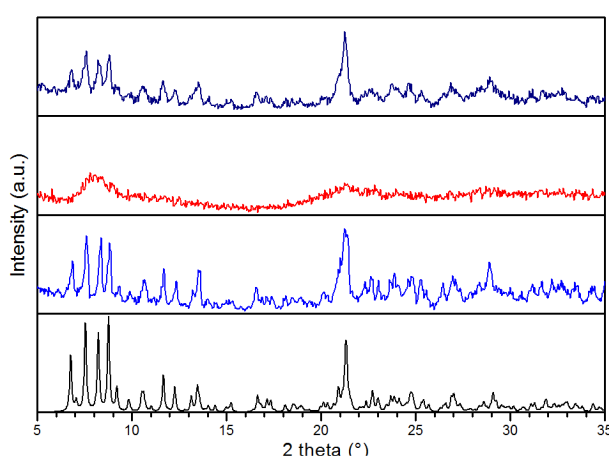**Fig. S32** PXRD diffractograms showing the simulated (black) and experimental patterns of unground (blue), ground (red) and CH<sub>2</sub>Cl<sub>2</sub> fumed (dark blue) forms of **2**.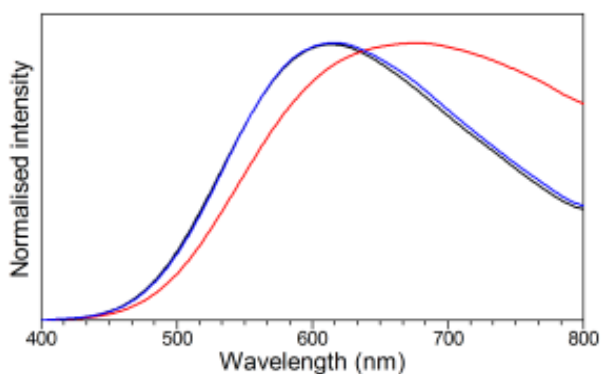**Fig. S33** Emission spectra showing the reversible mechanochromic luminescence of complex **2** (unground, black; ground, red and fumed, blue) upon excitation with 312 nm.

**Table S7** Emission data for crystalline-to-amorphous phase transition of complex **3**.

| Complex  | Stimuli  | Cycle No. | $\lambda_{\text{ex}} = 365 \text{ nm}$ |                          | $\lambda_{\text{ex}} = 312 \text{ nm}$ |                          |
|----------|----------|-----------|----------------------------------------|--------------------------|----------------------------------------|--------------------------|
|          |          |           | $\lambda_{\text{max}}$ (nm)            | $\tau$ ( $\mu\text{s}$ ) | $\lambda_{\text{max}}$ (nm)            | $\tau$ ( $\mu\text{s}$ ) |
| <b>3</b> | -        | -         | 559                                    | 3.5                      | 665                                    | 18                       |
|          | Grinding | 1         | 683                                    | 15                       | 681                                    | 16                       |
|          |          | 2         | 681                                    | 16                       | 679                                    | 16                       |
|          |          | 3         | 683                                    | 15                       | 680                                    | 17                       |
|          |          | 4         | 684                                    | 17                       | 680                                    | 15                       |
|          | Fuming   | 1         | 561                                    | 4.1                      | 665                                    | 17                       |
|          |          | 2         | 563                                    | 3.7                      | 664                                    | 17                       |
|          |          | 3         | 563                                    | 3.9                      | 666                                    | 18                       |
|          |          | 4         | 564                                    | 3.5                      | 667                                    | 17                       |

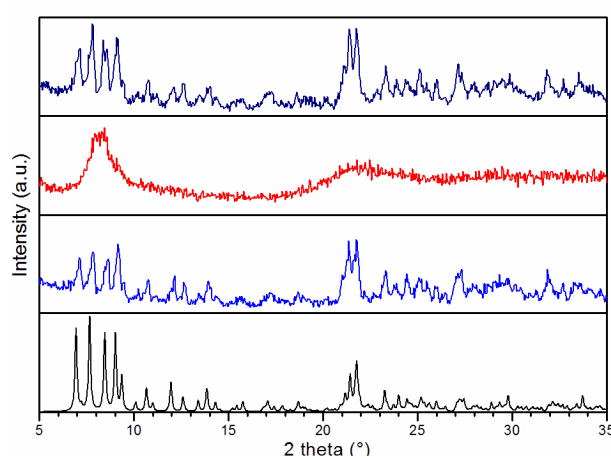**Fig. S34** PXRD diffractograms showing the simulated (black) and experimental patterns of unground (blue), ground (red) and CH<sub>2</sub>Cl<sub>2</sub> fumed (dark blue) forms of **3**.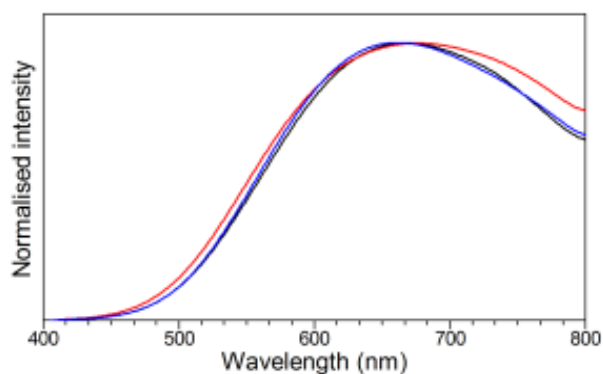**Fig. S35** Emission spectra showing the reversible mechanochromic luminescence of complex **3** (unground, black; ground, red and fumed, blue) upon excitation with 312 nm.

**Table S8** Emission data for crystalline-to-amorphous phase transition of complex **4**.

| Complex | Stimuli  | Cycle No. | $\lambda_{\text{ex}} = 365 \text{ nm}$ |                          | $\lambda_{\text{ex}} = 312 \text{ nm}$ |                          |
|---------|----------|-----------|----------------------------------------|--------------------------|----------------------------------------|--------------------------|
|         |          |           | $\lambda_{\text{max}}$ (nm)            | $\tau$ ( $\mu\text{s}$ ) | $\lambda_{\text{max}}$ (nm)            | $\tau$ ( $\mu\text{s}$ ) |
| 4       | -        | -         | 544                                    | 2.1                      | 602                                    | 19                       |
|         | Grinding | 1         | 710                                    | 17                       | 686                                    | 20                       |
|         |          | 2         | 715                                    | 17                       | 688                                    | 20                       |
|         |          | 3         | 721                                    | 16                       | 687                                    | 19                       |
|         |          | 4         | 718                                    | 18                       | 686                                    | 20                       |
|         | Fuming   | 1         | 546                                    | 2.7                      | 604                                    | 18                       |
|         |          | 2         | 546                                    | 2.9                      | 603                                    | 19                       |
|         |          | 3         | 548                                    | 3.0                      | 603                                    | 19                       |
|         |          | 4         | 547                                    | 2.6                      | 602                                    | 20                       |

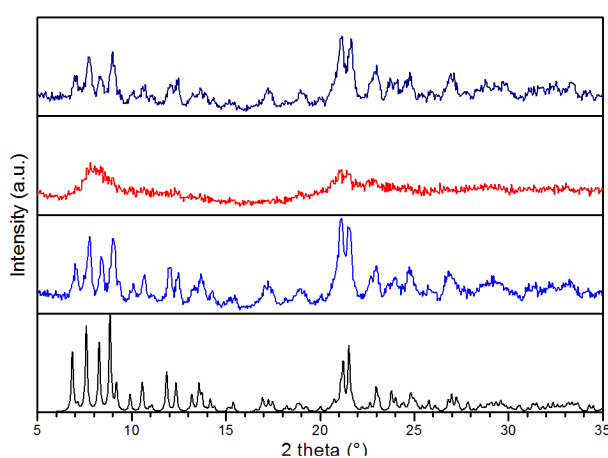**Fig. S36** PXRD diffractograms showing the simulated (black) and experimental patterns of unground (blue), ground (red) and  $\text{CH}_2\text{Cl}_2$  fumed (dark blue) forms of **4**.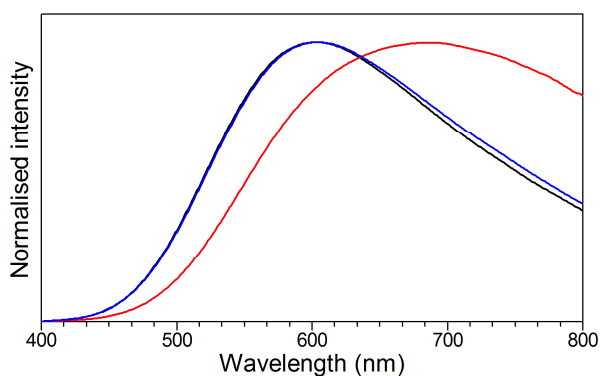**Fig. S37** Emission spectra showing the reversible mechanochromic luminescence of complex **4** (unground, black; ground, red and fumed, blue) upon excitation with 312 nm.

**Table S9** Emission data for crystalline-to-amorphous phase transition of complex **5**.

| Complex | Stimuli  | Cycle No. | $\lambda_{\text{ex}} = 365 \text{ nm}$ |                          | $\lambda_{\text{ex}} = 312 \text{ nm}$ |                          |
|---------|----------|-----------|----------------------------------------|--------------------------|----------------------------------------|--------------------------|
|         |          |           | $\lambda_{\text{max}}$ (nm)            | $\tau$ ( $\mu\text{s}$ ) | $\lambda_{\text{max}}$ (nm)            | $\tau$ ( $\mu\text{s}$ ) |
| 5       | -        | -         | 520                                    | 1.8                      | 612                                    | 19                       |
|         | Grinding | 1         | 718                                    | 16                       | 700                                    | 18                       |
|         |          | 2         | 715                                    | 18                       | 701                                    | 18                       |
|         |          | 3         | 721                                    | 17                       | 699                                    | 19                       |
|         |          | 4         | 715                                    | 16                       | 699                                    | 17                       |
|         | Fuming   | 1         | 519                                    | 2.9                      | 612                                    | 18                       |
|         |          | 2         | 516                                    | 2.5                      | 610                                    | 20                       |
|         |          | 3         | 517                                    | 2.8                      | 611                                    | 19                       |
|         |          | 4         | 517                                    | 2.6                      | 610                                    | 19                       |

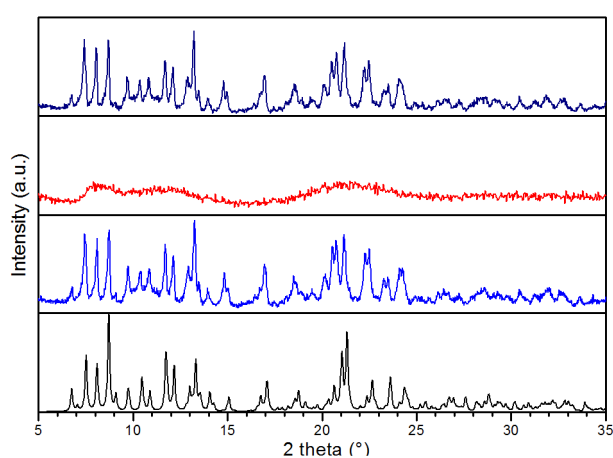

**Fig. S38** PXRD diffractograms showing the simulated (black) and experimental patterns of unground (blue), ground (red) and  $\text{CH}_2\text{Cl}_2$  fumed (dark blue) forms of **5**.

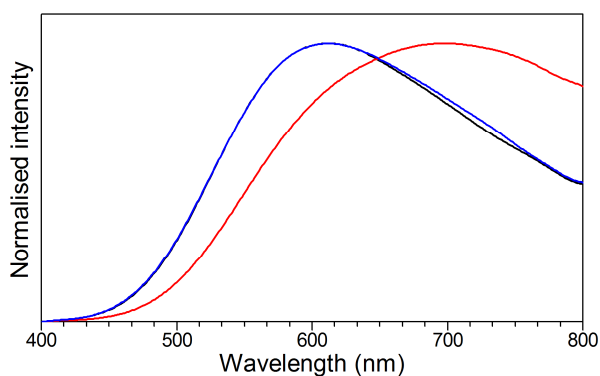

**Fig. S39** Emission spectra showing the reversible mechanochromic luminescence of complex **5** (unground, black; ground, red and fumed, blue) upon excitation with 312 nm.



**Table S10** Luminescence quantum yields of complexes **1–5** upon grinding and exposure to solvent vapours using 312 nm excitation at room temperature.

| Complex  | Ground | Fumed |
|----------|--------|-------|
| <b>1</b> | 0.06   | 0.11  |
| <b>2</b> | 0.05   | 0.12  |
| <b>3</b> | 0.07   | 0.10  |
| <b>4</b> | 0.06   | 0.10  |
| <b>5</b> | 0.05   | 0.11  |

**Table S11** Relevant bond lengths (Å) and angles (°) of yellow (**1**) and reddish-orange (**1R**) luminescent forms.

|                       | <b>1</b>  | <b>1R</b> |
|-----------------------|-----------|-----------|
| Au(1)–P(1)            | 2.338(1)  | 2.327(2)  |
| Au(1)–P(3)            | 2.333(1)  | 2.332(2)  |
| Au(2)–P(2)            | 2.310(1)  | 2.320(2)  |
| Au(2)–P(4)            | 2.309(1)  | 2.323(2)  |
| Au(1)···Au(2)         | 3.609(2)  | 3.2383(5) |
| P(1)–Au(1)–P(3)       | 168.16(2) | 160.7(1)  |
| P(2)–Au(2)–P(4)       | 164.89(2) | 169.6(1)  |
| P(1)–C(1)–C(8)–P(2)   | 53.0(2)   | 49.4(1)   |
| P(3)–C(13)–C(20)–P(4) | 58.2(2)   | 51.5(2)   |
| P(1)–P(3)–P(4)–P(2)   | 65.9(2)   | 69.3(2)   |
| P(1)–Au(1)–Au(2)–P(2) | 78.4(2)   | 80.8(2)   |
| P(3)–Au(1)–Au(2)–P(4) | 77.5(2)   | 83.8(2)   |
| P(1)–Au(1)–Au(2)–P(4) | –101.3(2) | –100.2(2) |
| P(3)–Au(1)–Au(2)–P(2) | –102.9(2) | –95.1(2)  |

## Details of the movie

The movie showing the reversibility of mechanochromic luminescence of **2** was recorded on a Nikon D5100 digital camera. The camera was in automatic white balance mode. In the early part of the movie, the crystals are shown under ambient light (white), then under 312 nm (orange), and 365 nm UV light (greenish-yellow). The crystals were ground by a spatula and pestle under UV irradiation with black light (365 nm). The change in the emission colour from yellowish-green to reddish-orange was observed, which intensified under 312 nm illumination. The 365 nm UV lamp was switched on, the ground sample was fumed with CH<sub>2</sub>Cl<sub>2</sub> vapours, and the reddish-orange emission rapidly changed into greenish-yellow. Under 312 nm illumination the recovered solid shows reddish-orange emission. Then a second cycle with emission colour change from greenish-yellow to reddish-orange (under 365 nm) and orange to burning reddish-orange (under 312 nm) was recorded. It is worth noting that although the quantum yields of the ground complexes are practically excitation wavelength-independent, the absorbance of the ground **2** is much higher at 312 nm than at 365 nm. For this reason, the thin layer of the fine powdered sample on the wall of the mortar absorbs and emits much intensively upon 312 nm as compared to 365 nm.

## Acknowledgements

The authors gratefully acknowledge the support by MTA (Hungarian Academy of Sciences) through the Lendület Programme (LP2012-21/2012).

We thank Ms. Laura Oláh's (Msc. student) for her contribution in the synthetic work. The authors are indebted to Dr. Attila Domján (NMR Spectroscopy Research Group, Institute of Organic Chemistry, Research Centre for Natural Sciences, Hungarian Academy of Sciences, Budapest, Hungary) for NMR spectroscopy measurements. We also thank Dr. Ágnes Gömöry and Dr. Olivér Ozohanics (MS Proteomics Research Group, Institute of Organic Chemistry, Research Centre for Natural Sciences, Hungarian Academy of Sciences, Budapest, Hungary) for HRMS-ESI measurements.

## References

- [1] *Gaussian 09*, Revision C.01, M. J. Frisch, G. W. Trucks, H. B. Schlegel, G. E. Scuseria, M. A. Robb, J. R. Cheeseman, G. Scalmani, V. Barone, B. Mennucci, G. A. Petersson, H. Nakatsuji, M. Caricato, X. Li, H. P. Hratchian, A. F. Izmaylov, J. Bloino, G. Zheng, J. L. Sonnenberg, M. Hada, M. Ehara, K. Toyota, R. Fukuda, J. Hasegawa, M. Ishida, T. Nakajima, Y. Honda, O. Kitao, H. Nakai, T. Vreven, J. A. Montgomery, Jr., J. E. Peralta, F. Ogliaro, M. Bearpark, J. J. Heyd, E. Brothers, K. N. Kudin, V. N. Staroverov, R. Kobayashi, J. Normand, K. Raghavachari, A. Rendell, J. C. Burant, S. S. Iyengar, J. Tomasi, M. Cossi, N. Rega, J. M. Millam, M. Klene, J. E. Knox, J. B. Cross, V. Bakken, C. Adamo, J. Jaramillo, R. Gomperts, R. E. Stratmann, O. Yazyev, A. J. Austin, R. Cammi, C. Pomelli, J. W. Ochterski, R. L. Martin, K. Morokuma, V. G. Zakrzewski, G. A. Voth, P. Salvador, J. J. Dannenberg, S. Dapprich, A. D. Daniels, Ö. Farkas, J. B. Foresman, J. V. Ortiz, J. Cioslowski, and D. J. Fox, *Gaussian*, Inc., Wallingford CT, **2009**.
- [2] Y. Zhao and D. G. Truhlar, *Acc. Chem. Res.*, **2008**, *41*, 157–167.
- [3] Ugo Varetto, Molekel 5.4, [http:// http://ugovaretto.github.io/molekel/](http://ugovaretto.github.io/molekel/)
